# Supplementary material for: Is mental time embodied interpersonally?
Source: Springer Nature journal article supplement (doi:10.1007/s10339-018-0857-6), 2018-02-20
Supplement: 10339_2018_857_MOESM1_ESM.pdf [file 10339_2018_857_MOESM1_ESM.pdf]

## **Supplementary Material**

### **Is mental time embodied interpersonally? (*Cognitive Processing*)**

Sven Thönes \*, Kurt Stocker, Peter Brugger, Heiko Hecht

Corresponding author: Sven Thönes, Ergonomics, Leibniz Research Centre for Working Environment and Human Factors, Ardeystr. 67, 44139 Dortmund  
e-mail: [thoenes@ifado.de](mailto:thoenes@ifado.de), phone: +49 231 1084 371

## Supplementary Table 1

Mean reaction times in ms to past vs. future related words (standard deviation in parentheses)  
in the different experimental conditions

---

|                                         |                                 |            |
|-----------------------------------------|---------------------------------|------------|
| <b>Avatar</b><br><b>task-irrelevant</b> |                                 |            |
|                                         | <i>Mapping incongruent</i>      |            |
|                                         | future word; front-left avatar  | 812 (128)  |
|                                         | future word; front-right avatar | 822 (139)  |
|                                         | future word; back-left avatar   | 815 (123)  |
|                                         | future word; back-right avatar  | 845 (162)  |
|                                         | past word; front-left avatar    | 843 (196)  |
|                                         | past word; front-right avatar   | 815 (155)  |
|                                         | past word; back-left avatar     | 833 (150)  |
|                                         | past word; back-right avatar    | 818 (162)  |
|                                         | <i>Mapping congruent</i>        |            |
|                                         | future word; front-left avatar  | 798 (137)  |
|                                         | future word; front-right avatar | 779 (135)  |
|                                         | future word; back-left avatar   | 789 (122)  |
|                                         | future word; back-right avatar  | 773 (140)  |
|                                         | past word; front-left avatar    | 728 (128)  |
|                                         | past word; front-right avatar   | 735 (121)  |
|                                         | past word; back-left avatar     | 734 (136)  |
|                                         | past word; back-right avatar    | 718 (114)  |
| <b>Avatar</b><br><b>task-relevant</b>   |                                 |            |
|                                         | <i>Mapping incongruent</i>      |            |
|                                         | future word; front-left avatar  | 1045 (211) |
|                                         | future word; front-right avatar | 1120 (270) |
|                                         | future word; back-left avatar   | 1074 (261) |
|                                         | future word; back-right avatar  | 1098 (216) |
|                                         | past word; front-left avatar    | 1003 (207) |
|                                         | past word; front-right avatar   | 1052 (253) |
|                                         | past word; back-left avatar     | 1049 (206) |
|                                         | past word; back-right avatar    | 992 (239)  |
|                                         | <i>Mapping congruent</i>        |            |
|                                         | future word; front-left avatar  | 1034 (248) |
|                                         | future word; front-right avatar | 1029 (238) |
|                                         | future word; back-left avatar   | 1019 (251) |
|                                         | future word; back-right avatar  | 1008 (254) |
|                                         | past word; front-left avatar    | 952 (261)  |
|                                         | past word; front-right avatar   | 1008 (266) |
|                                         | past word; back-left avatar     | 989 (254)  |
|                                         | past word; back-right avatar    | 979 (209)  |

---
